# Supplementary material for: Cardiovascular Events, Sleep Apnoea, and Pulmonary Hypertension in Primary Sjögren’s Syndrome: Data from the French Health Insurance Database
Source: MDPI journal article supplement (doi:10.3390/jcm10215115), 2021-10-30
Supplement: s1 [file s1]

**Supplementary table S1:** Autoimmune conditions classifying Sjögren's syndrome as secondary, and thus leading to the exclusion of the patient from the studied population.

| ICD-10 code | Corresponding disease                               |
|-------------|-----------------------------------------------------|
| M069        | Rheumatoid arthritis                                |
| M068        | Other rheumatoid arthritis                          |
| M063        | Rheumatoid nodule                                   |
| M060        | Seronegative rheumatoid arthritis                   |
| M080        | Juvenile rheumatoid arthritis or juvenile arthritis |
| M05         | Seropositive rheumatoid arthritis                   |
| L930        | Systemic lupus erythematosus                        |
| L931        | Cutaneous subacute lupus erythematosus              |
| M321        | Systemic lupus erythematosus with organ involvement |
| M328        | Other systemic lupus erythematosus                  |
| M348        | Other systemic sclerosis                            |
| M349        | Systemic sclerosis                                  |
| M332        | Polymyositis                                        |
| M308        | Other disease mimicking polyarteritis nodosa        |
| M316        | Giant cell arteritis                                |
| M314        | Takayasu's large-vessel vasculitis                  |
| M303        | Kawazaki's syndrome                                 |
| M300        | Polyarteritis nodosa                                |
| L959        | Skin vasculitis                                     |
| M313        | Granulomatosis with polyangiitis                    |
| M317        | Microscopic polyangiitis                            |
| M301        | Eosinophilic Granulomatosis with Polyangiitis       |
| D690        | Allergic purpura                                    |
| M318        | Other necrotizing vasculitis                        |
| M352        | Behçet's disease                                    |
| M090        | Juvenile polyarthritis with psoriasis               |
| M023        | Reactive arthritis / Reiter's syndrome              |
| B171        | Hepatitis C                                         |
| D86         | Sarcoidosis                                         |
| K50         | Crohn's disease                                     |
| K51         | Ulcerative colitis                                  |
| B20         | HIV infection with infectious disease               |
| B24         | HIV infection                                       |
| E85         | Amyloidosis                                         |

ICD, international Classification of diseases.

**Supplementary table S2:** codes and combinations of codes of cardiovascular risk factors, cardiovascular events, venous thromboembolic events, and pulmonary hypertension, according to international classification of diseases (ICD-10), as searched in the French hospitalised patients' database.

|                                                                                                                                                                                                                | ICD 10 codes                                                                     |
|----------------------------------------------------------------------------------------------------------------------------------------------------------------------------------------------------------------|----------------------------------------------------------------------------------|
| <b>Cardiovascular risk factors and associated factors</b>                                                                                                                                                      |                                                                                  |
| Hypertension                                                                                                                                                                                                   | I10, I15                                                                         |
| Diabetes                                                                                                                                                                                                       | E10, E11, E12, E13, E14                                                          |
| Obesity                                                                                                                                                                                                        | E66                                                                              |
| Sleep apnea syndrome                                                                                                                                                                                           | G473                                                                             |
| Chronic kidney disease (all stages)                                                                                                                                                                            | N18                                                                              |
| Dialysis                                                                                                                                                                                                       | Z491                                                                             |
| <b>Cardiovascular events (CVE)</b>                                                                                                                                                                             |                                                                                  |
| Ischemic heart diseases (angina, acute myocardial infarction, repeated myocardial infarctions, complications of recent myocardial infarction, other acute myocardial infarction, Chronic ischemic cardiopathy) | I20 - I25                                                                        |
| Stroke                                                                                                                                                                                                         | I63, I64                                                                         |
| Heart failure                                                                                                                                                                                                  | I50                                                                              |
| Hypertension complications, (hypertensive cardiomyopathy and/or nephropathy, aortic dissection)                                                                                                                | I11, I12, I13, I71                                                               |
| Aortic and peripheral arterial disease                                                                                                                                                                         | I70                                                                              |
| Cardiovascular diseases (ischemic heart disease, stroke, aortic dissection, aortic and peripheral arterial disease, and hypertensive chronic kidney disease)                                                   | I20, I21, I22, I23, I24, I25, I70, I71, I63, I64                                 |
| <b>Pulmonary hypertension</b>                                                                                                                                                                                  | I272, I270                                                                       |
| <b>Venous thromboembolic events (VTE)</b>                                                                                                                                                                      |                                                                                  |
| Superficial vein thrombosis                                                                                                                                                                                    | I800                                                                             |
| Deep vein thrombosis                                                                                                                                                                                           | I803, I809                                                                       |
| Pulmonary embolism                                                                                                                                                                                             | I269                                                                             |
| All vein thromboses (superficial and deep vein thromboses, vena cava thrombosis, portal vein thrombosis, and Budd-Chiari syndrome)                                                                             | I80, I800, I801, I802, I803, I808, I809, I82, I820, I821, I823, I828, I829, I822 |
| <b>Adjustment covariates</b>                                                                                                                                                                                   |                                                                                  |
| Chronic Obstructive Pulmonary Disease                                                                                                                                                                          | J44                                                                              |
| Chronic Respiratory Failure                                                                                                                                                                                    | J961                                                                             |
| Interstitial pneumonitis and lung fibrosis                                                                                                                                                                     | J84                                                                              |
| Lymphoma                                                                                                                                                                                                       | C77, C81 - C86                                                                   |
| Myeloproliferative disorder                                                                                                                                                                                    | D45, D47                                                                         |
| Neuropsychiatric disorders (Depression, anxiety or dementia)                                                                                                                                                   | F32, F33, F40, F41, F00, F01, F02, F03                                           |

ICD, international classification of diseases

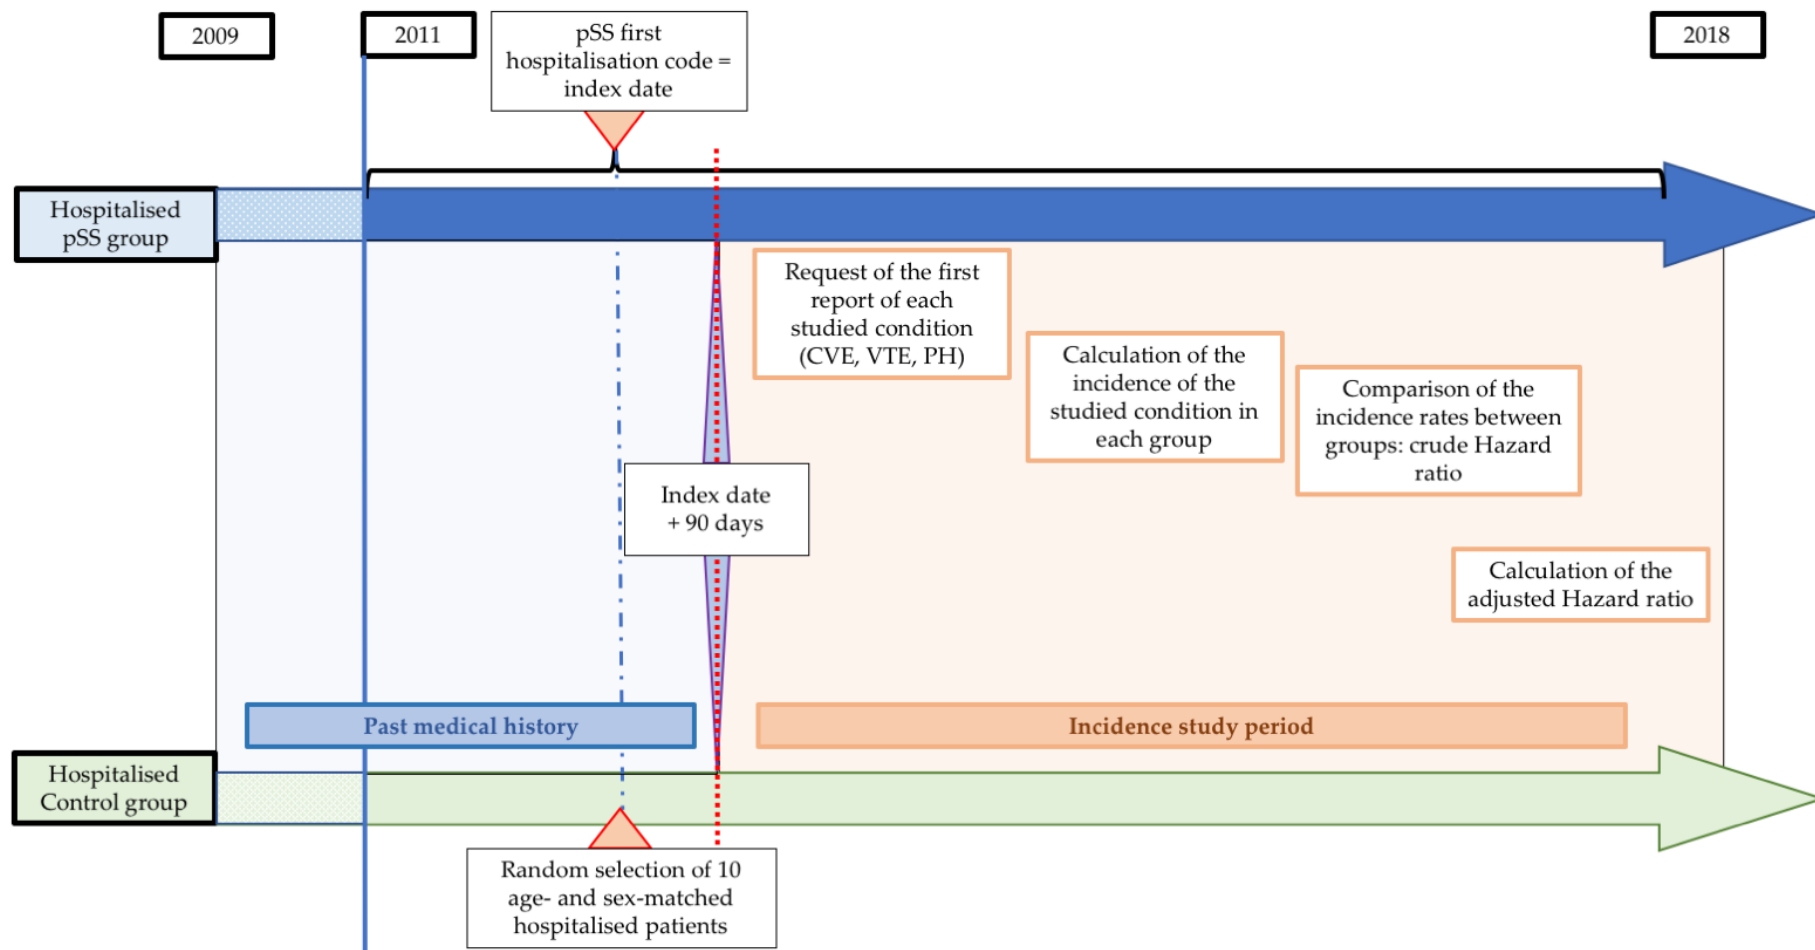

**Supplementary Figure S1: Study design.** The blue part represents the studied period of past medical history, and the orange part represents the incidence study period. *CVE*, cardiovascular events; *VTE*, venous thromboembolic events; *PH*, pulmonary hypertension.
